# Supplementary material for: Growth of gold nanorods in solution and on ITO and Au substrates using non-peripheral amine functionalized nickel(ii) phthalocyanine capped gold nanoparticles as a seed solution
Source: Royal Society of Chemistry journal article supplement (doi:10.1039/c2ra22377e), 2012-11-15
Supplement: c2ra22377e.pdf [file c2ra22377e.pdf]

Supporting Information

**Growth of gold nanorods in solution and on ITO and Au substrates using non-peripheral amine functionalized nickel(II) phthalocyanine capped gold nanoparticles as a seed solution**

A. John Jeevagan, M. Amal Raj and S. Abraham John\*

Centre for Nanoscience and Nanotechnology

Department of Chemistry, Gandhigram Rural Institute

Gandhigram-624 302, Dindigul, India

---

\*To whom correspondence should be addressed. E-mail: [abrajohn@yahoo.co.in](mailto:abrajohn@yahoo.co.in)

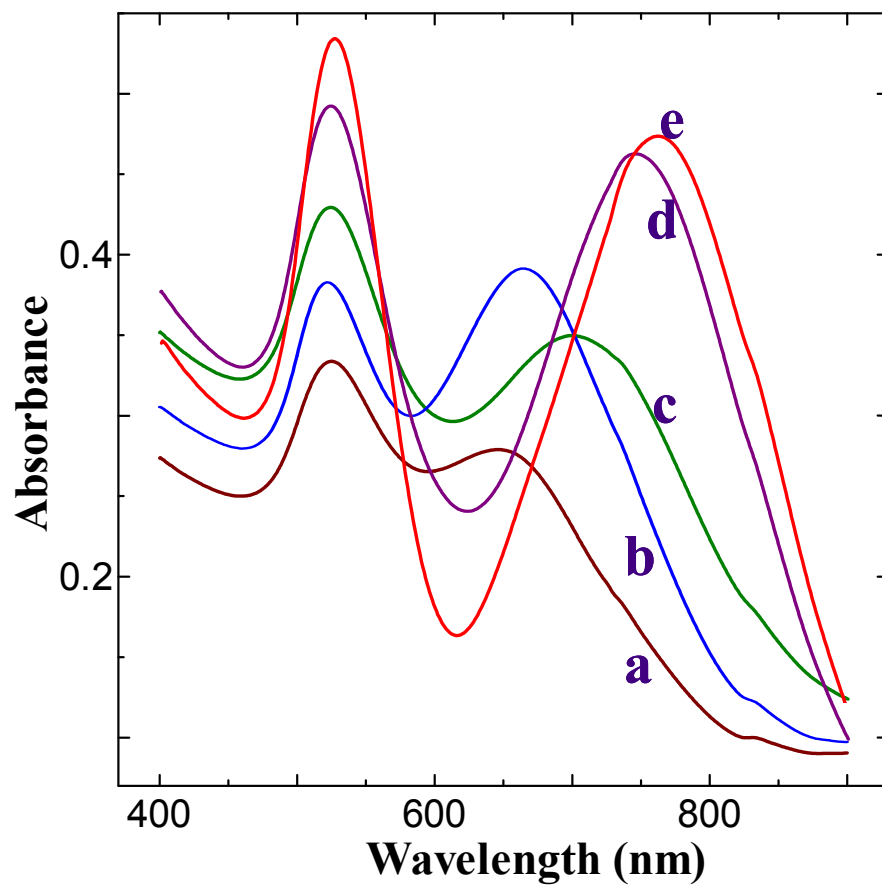

**Figure S1.** UV-vis spectra obtained for the growth of GNRs by different volume of (a) 50 (b) 100 (c) 150 (d) 200 and (e) 250  $\mu\text{L}$  of 0.004 M the silver ion

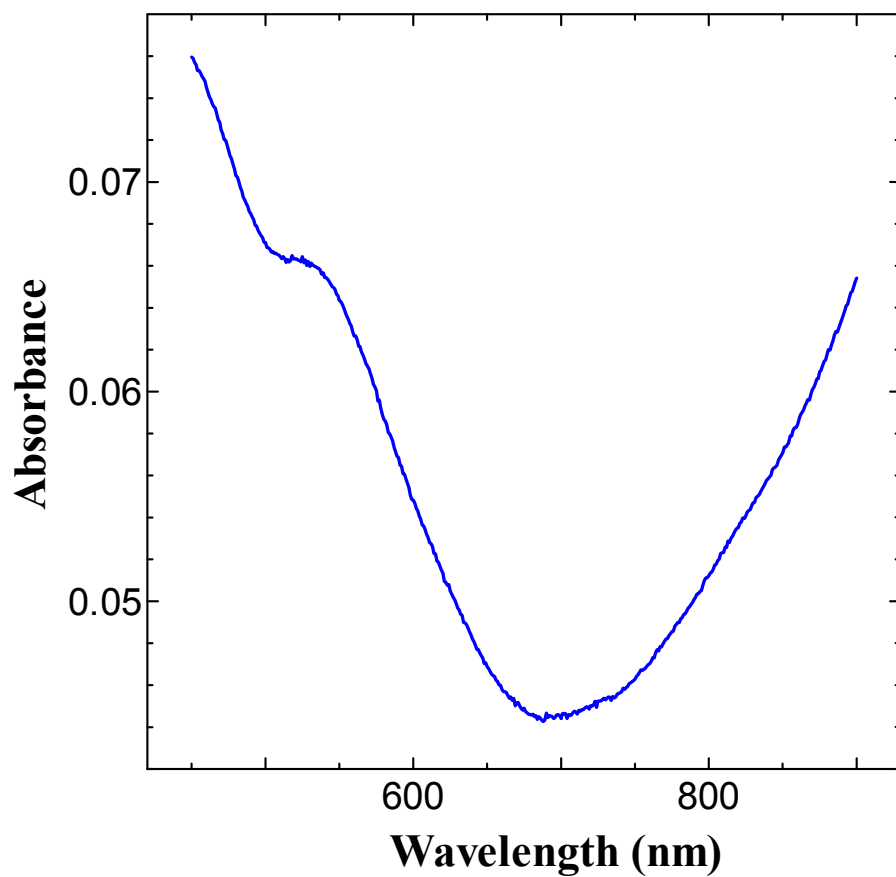

**Figure S2.** UV-vis absorption spectrum of colloidal GNRs directly immobilized on the MPTS sol-gel modified ITO plate.

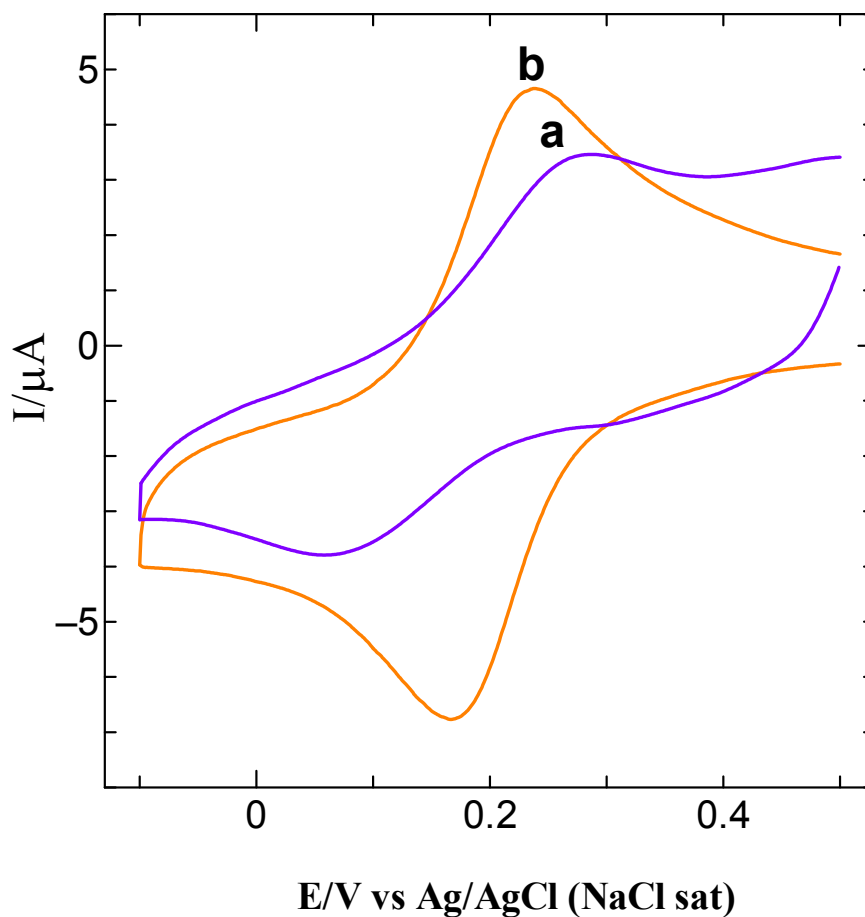

**Figure S3.** CVs obtained for (a) direct attachment of GNRs on Au/MPTS and (b) surface grown GNRs electrodes at a scan rate of  $50 \text{ mV s}^{-1}$  in 0.2 M PB solution (pH=7.2) containing 1 mM  $\text{K}_3[\text{Fe}(\text{CN})_6]$ .

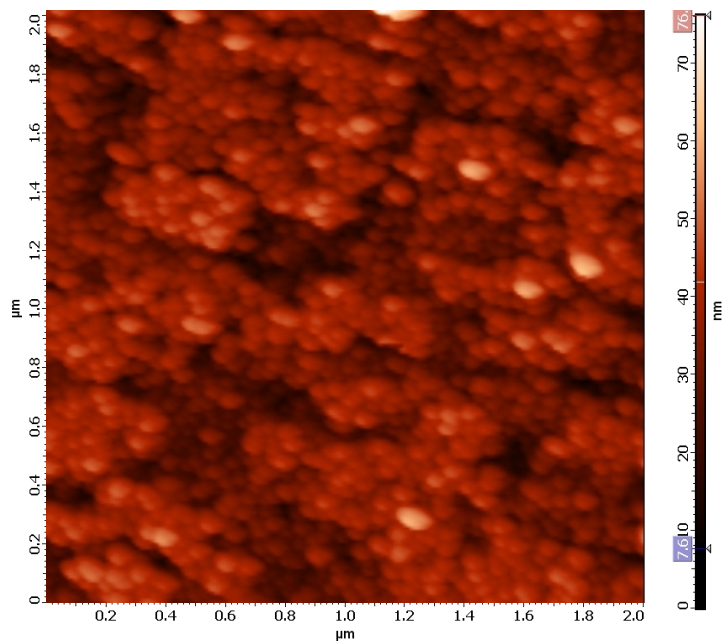

**Figure S4.** AFM image of spherical  $4\alpha\text{-Ni}^{\text{II}}\text{TAPc-AuNPs}$  adsorbed on the MPTS sol-gel film modified ITO plate ( $2 \times 2 \mu\text{m}$ )

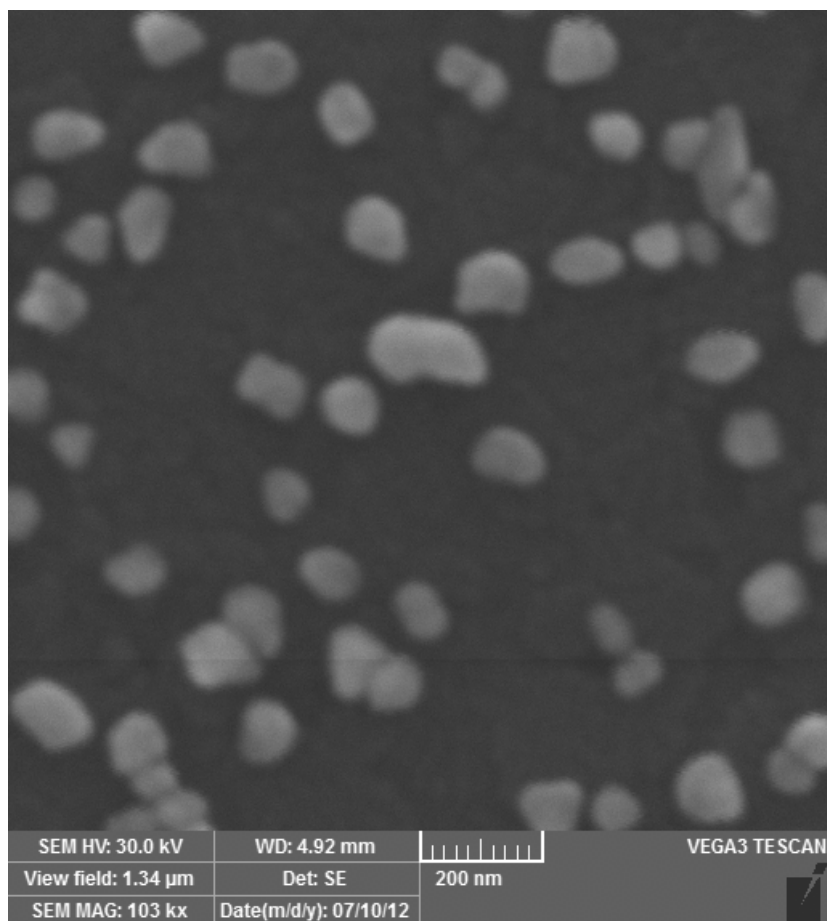

**Figure S5.** SEM image of GNRs grown ITO plates

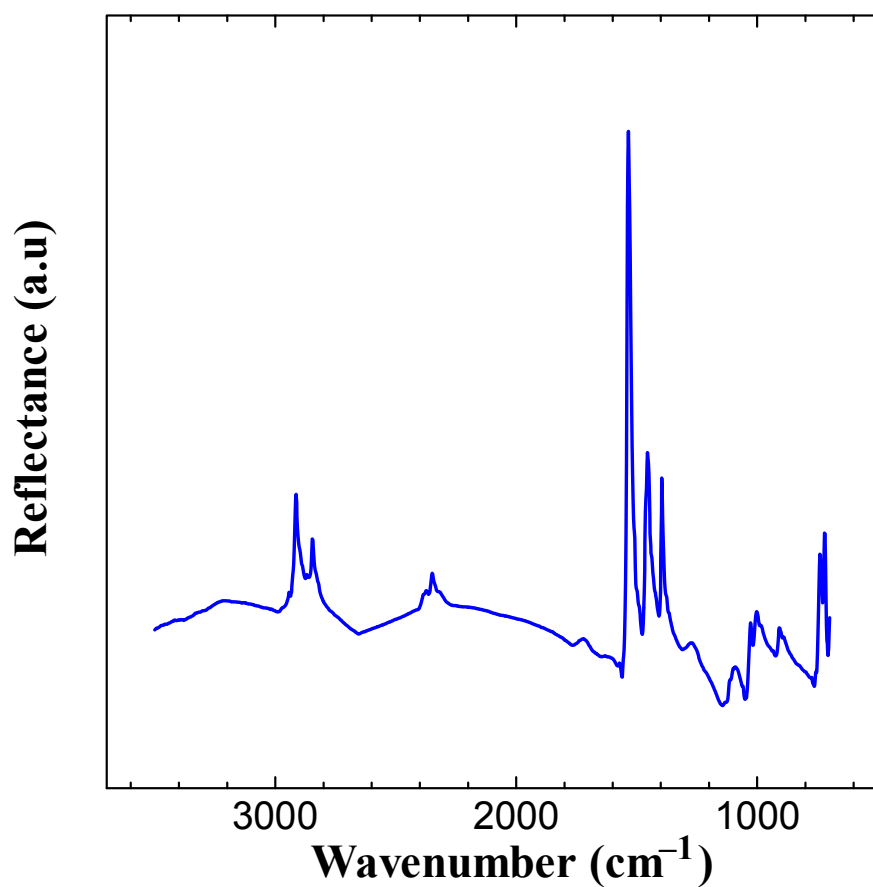

**Figure S6.** ATR-FT-IR spectrum of surface-grown GNRs on the MPTS sol-gel film modified ITO substrate.

**Table S1**

Impedance spectral data

| Parameter <sup>a</sup>                | Bare Au electrode       | Au/MPTS electrode       | Au/MPTS/4α-Ni <sup>II</sup> TAPc-AuNPs electrode | Au/MPTS/GNRs electrode  |
|---------------------------------------|-------------------------|-------------------------|--------------------------------------------------|-------------------------|
| R <sub>s</sub> (kΩ)                   | 0.306<br>(0.51)         | 0.212<br>(0.43)         | 0.304<br>(0.87)                                  | 0.556<br>(0.76)         |
| CPE (μF)                              | 3.50<br>(0.57)          | 1.05<br>(0.38)          | 0.604<br>(0.77)                                  | 0.865<br>(0.83)         |
| R <sub>CT</sub> (kΩ)                  | 27.14<br>(0.61)         | 139.75<br>(0.35)        | 34.50<br>(0.83)                                  | 50.53<br>(0.71)         |
| k <sub>et</sub> (cm s <sup>-1</sup> ) | 4.92 × 10 <sup>-4</sup> | 9.51 × 10 <sup>-5</sup> | 3.85 × 10 <sup>-4</sup>                          | 2.63 × 10 <sup>-4</sup> |

<sup>a</sup> Percent errors from the fit for each element are given in parentheses.
